# Supplementary material
Source: HighWire-hosted journal article supplement (https://erj.ersjournals.com/content/59/3/2100621)

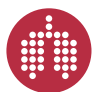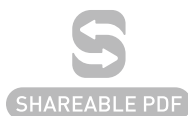

# Emergence of bedaquiline resistance in a high tuberculosis burden country

Elena Chesov<sup>1,2,3,4,12</sup>, Dumitru Chesov<sup>1,3,4,12</sup>, Florian P. Maurer<sup>5,6</sup>, Sönke Andres<sup>5</sup>, Christian Utpatel<sup>7</sup>, Ivan Barilar<sup>7</sup>, Ana Donica<sup>2</sup>, Maja Reimann<sup>3,4,8</sup>, Stefan Niemann<sup>3,5,7</sup>, Christoph Lange<sup>2,3,8,9,10</sup>, Valeriu Crudu<sup>2</sup>, Jan Heyckendorf<sup>3,4,8,12</sup> and Matthias Merker<sup>3,7,11,12</sup>

<sup>1</sup>Nicolae Testemitanu State University of Medicine and Pharmacy, Chisinau, Republic of Moldova. <sup>2</sup>Chiril Draganuic Phthiisopneumology Institute, Chisinau, Republic of Moldova. <sup>3</sup>German Centre for Infection Research (DZIF), Partner site Hamburg-Lübeck-Borstel-Riems, Germany. <sup>4</sup>Clinical Infectious Diseases, Research Center Borstel, Borstel, Germany. <sup>5</sup>National and Supranational Reference Center for Mycobacteria, Research Center Borstel, Borstel, Germany. <sup>6</sup>Institute of Medical Microbiology, Virology and Hygiene, University Medical Center Hamburg-Eppendorf, Hamburg, Germany. <sup>7</sup>Molecular and Experimental Mycobacteriology, Research Center Borstel, Borstel, Germany. <sup>8</sup>Respiratory Medicine & International Health, University of Lübeck, Lübeck, Germany. <sup>9</sup>Department of Medicine, Umeå University, Umeå, Sweden. <sup>10</sup>Global TB Program, Baylor College of Medicine and Texas Children's Hospital, Houston, TX, USA. <sup>11</sup>Evolution of the Resistome, Research Center Borstel, Borstel, Germany. <sup>12</sup>These authors contributed equally.

Corresponding author: Matthias Merker ([mmerker@fz-borstel.de](mailto:mmerker@fz-borstel.de))

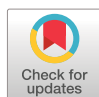

Shareable abstract (@ERSpublications)

**Bedaquiline resistance emerged in >15% of *Mycobacterium tuberculosis* complex strains obtained from follow-up isolates of MDR-TB patients. Insufficient backbone regimens and cavitary disease were associated with treatment failure and death.** <https://bit.ly/2UHoVyG>

**Cite this article as:** Chesov E, Chesov D, Maurer FP, *et al.* Emergence of bedaquiline resistance in a high tuberculosis burden country. *Eur Respir J* 2022; 59: 2100621 [DOI: 10.1183/13993003.00621-2021].

This single-page version can be shared freely online.

Copyright ©The authors 2022.

This version is distributed under the terms of the Creative Commons Attribution Non-Commercial Licence 4.0. For commercial reproduction rights and permissions contact [permissions@ersnet.org](mailto:permissions@ersnet.org)

This article has an editorial commentary: <https://doi.org/10.1183/13993003.00149-2022>

Received: 1 March 2021  
Accepted: 18 Aug 2021

## Abstract

**Rationale** Bedaquiline has been classified as a group A drug for the treatment of multidrug-resistant tuberculosis (MDR-TB) by the World Health Organization; however, globally emerging resistance threatens the effectivity of novel MDR-TB treatment regimens.

**Objectives** We analysed pre-existing and emerging bedaquiline resistance in bedaquiline-based MDR-TB therapies, and risk factors associated with treatment failure and death.

**Methods** In a cross-sectional cohort study, we employed patient data, whole-genome sequencing (WGS) and phenotyping of *Mycobacterium tuberculosis* complex (MTBC) isolates. We could retrieve baseline isolates from 30.5% (62 out of 203) of all MDR-TB patients who received bedaquiline between 2016 and 2018 in the Republic of Moldova. This includes 26 patients for whom we could also retrieve a follow-up isolate.

**Measurements and main results** At baseline, all MTBC isolates were susceptible to bedaquiline. Among 26 patients with available baseline and follow-up isolates, four (15.3%) patients harboured strains which acquired bedaquiline resistance under therapy, while one (3.8%) patient was re-infected with a second bedaquiline-resistant strain. Treatment failure and death were associated with cavitary disease ( $p=0.011$ ), and any additional drug prescribed in the bedaquiline-containing regimen with WGS-predicted resistance at baseline (OR 1.92 per unit increase, 95% CI 1.15–3.21;  $p=0.012$ ).

**Conclusions** MDR-TB treatments based on bedaquiline require a functional background regimen to achieve high cure rates and to prevent the evolution of bedaquiline resistance. Novel MDR-TB therapies with bedaquiline require timely and comprehensive drug resistance monitoring.

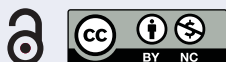

Supplement: inline-supplementary-material-4 [file inline-supplementary-material-4.pdf]
