# Supplementary material
Source: HighWire-hosted journal article supplement (https://erj.ersjournals.com/content/59/3/2100621)
Supplement: inline-supplementary-material-3 [file inline-supplementary-material-3.pdf]

## Supplementary Table S2

Characteristics of all patients receiving a bedaquiline (BDQ) containing treatment regimen against multidrug resistant tuberculosis in the Republic of Moldova (2016-2018). IQR= interquartile range, PTC=previously treated case

| Patient characteristics  | All patients receiving BDQ 2016-2018 % (n) | Patients included % (n) | Patients excluded % (n) | P-value |
|--------------------------|--------------------------------------------|-------------------------|-------------------------|---------|
| Urban                    | 48.8 (99/203)                              | 41.9 (26/62)            | 51.8 (73/141)           | 0.2240  |
| Male                     | 75.9 (154/203)                             | 80.6 (50/62)            | 73.8 (104/141)          | 0.3736  |
| Age, median (IQR)        | 37 (31-45)                                 | 39 (34-45)              | 36 (30-45)              | 0.0938  |
| Microscopy +             | 72.4 (147/203)                             | 74.2 (46/62)            | 71.6 (101/141)          | 0.7367  |
| <b>Case definition</b>   |                                            |                         |                         |         |
| New case                 | 25.1 (51/203)                              | 29.0 (18/62)            | 23.4 (33/141)           | 0.4824  |
| PTC-relapse              | 14.8 (30/203)                              | 12.9 (8/62)             | 15.6 (22/141)           | 0.6741  |
| PTC-default              | 13.8 (28/203)                              | 17.7 (11/62)            | 12.1 (17/141)           | 0.2784  |
| PTC-failure              | 46.3 (94/203)                              | 40.3 (25/62)            | 48.9 (69/141)           | 0.2868  |
| <b>Treatment outcome</b> |                                            |                         |                         |         |
| still on treatment       | 6.9 (14/203)                               | 6.5 (4/62)              | 7.1 (10/141)            | 1.0000  |
| lost to follow-up        | 7.4 (15/203)                               | 9.7 (6/62)              | 6.4 (9/141)             | 0.3975  |
| cured                    | 66.7 (116/174)                             | 71.2 (37/52)            | 64.8 (79/122)           | 0.4838  |
| failure                  | 25.9 (45/174)                              | 23.1 (12/52)            | 27.0 (33/122)           | 0.7059  |
| died                     | 7.5 (13/174)                               | 5.8 (3/52)              | 8.2 (10/122)            | 0.7571  |
| <b>HIV status</b>        |                                            |                         |                         |         |
| HIV +                    | 12.7 (25/197)                              | 12.9 (8/62)             | 12.6 (17/135)           | 1.0000  |
| HIV status unknown       | 3.0 (6/203)                                | 0.00 (0/62)             | 4.3 (6/141)             | 0.1804  |
